# Supplementary material for: Long-Term Preservation and Storage of Faecal Samples in Whatman® Cards for PCR Detection and Genotyping of Giardia duodenalis and Cryptosporidium hominis
Source: MDPI journal article supplement (doi:10.3390/ani11051369), 2021-05-12
Supplement: s1 [file s1]

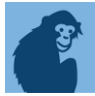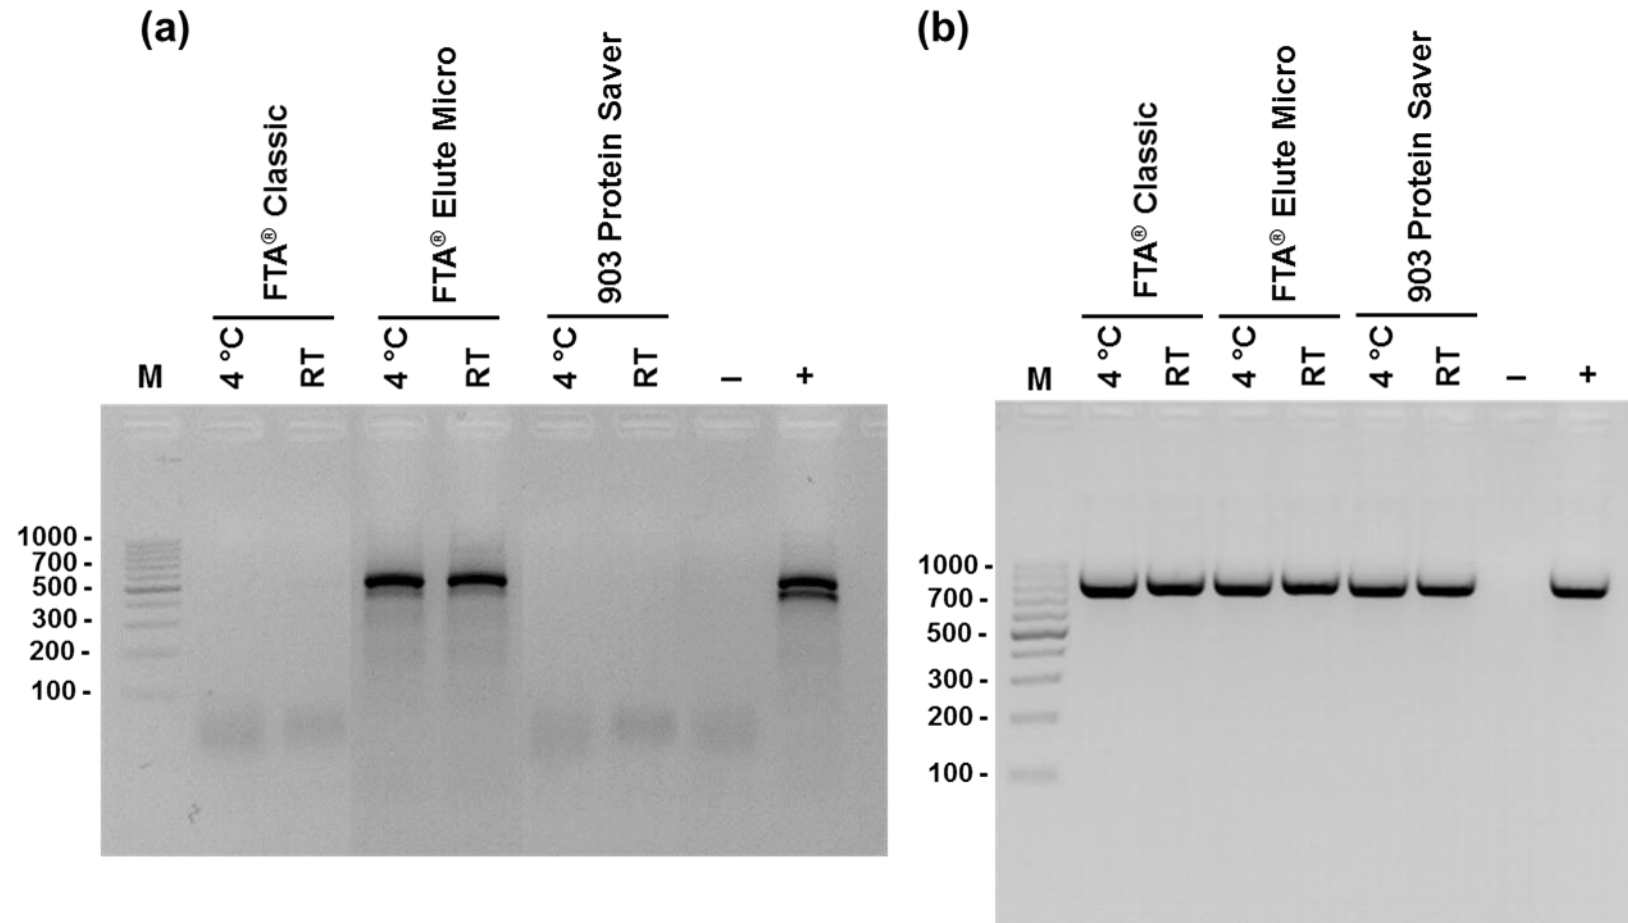

**Figure S1.** Agarose gel electrophoresis (2% w/v) detection of PCR products used for evaluating the suitability of Whatman® cards for genotyping and Sanger sequencing purposes. (a) Results showing the presence of a 432-bp amplicon for the *Giardia duodenalis* *gdh* gene in sample G145. Some lanes have been cut and re-arranged to keep the same order in the whole figure; (b): Results showing the presence of a 870-bp amplicon for the *Cryptosporidium hominis* *gp60* gene in sample C578.
