# Supplementary material for: Long-Term Preservation and Storage of Faecal Samples in Whatman® Cards for PCR Detection and Genotyping of Giardia duodenalis and Cryptosporidium hominis
Source: MDPI journal article supplement (doi:10.3390/ani11051369), 2021-05-12

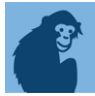

**Figure S2.** Representative chromatograms showing Sanger sequencing results for PCR amplicons generated from genomic DNA extracted and purified from Whatman® cards. (a): Results for the *Giardia duodenalis* *gdh* gene in sample G415; (b): Results for the *Cryptosporidium hominis* *gp60* gene in sample C578. For each sample, forward and reverse sequences are shown.

(a)

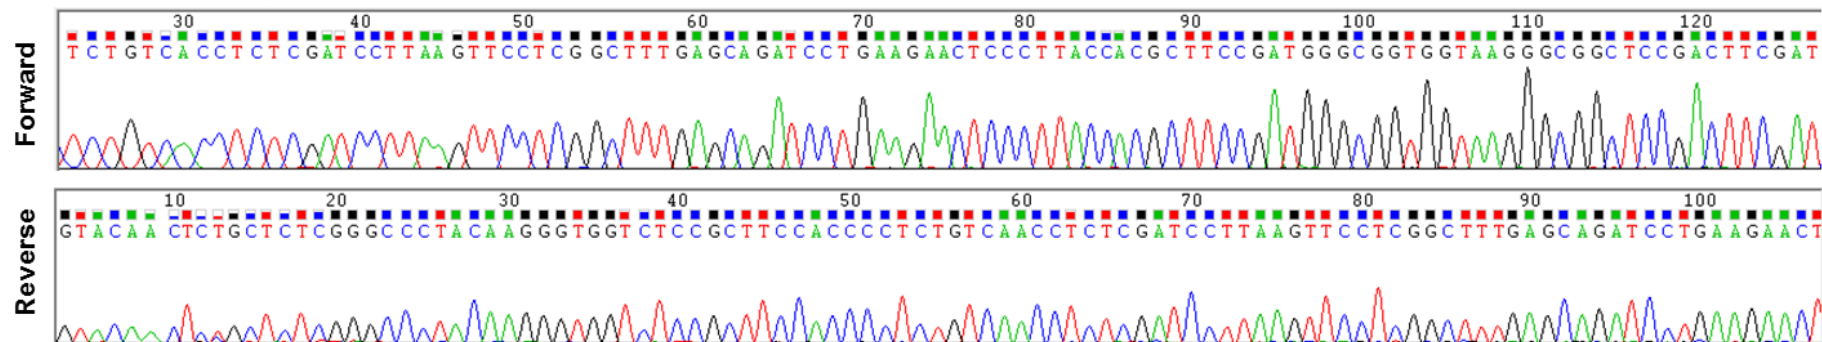

(b)

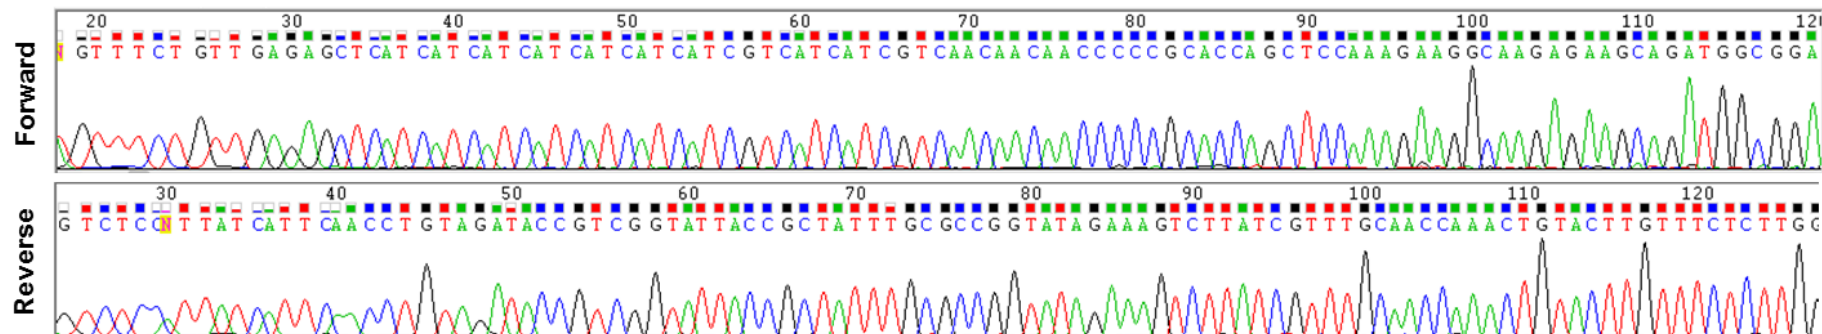

Supplement: s1 [file s1]
