# Supplementary material for: Long-Term Preservation and Storage of Faecal Samples in Whatman® Cards for PCR Detection and Genotyping of Giardia duodenalis and Cryptosporidium hominis
Source: MDPI journal article supplement (doi:10.3390/ani11051369), 2021-05-12
Supplement: s1 [file s1]

**Table S1.** Real-time PCR cycle threshold values obtained after the amplification of *Giardia duodenalis*-positive stool samples impregnated in the Whatman® Cards at the storage periods and conditions assessed in the present study.

| Whatman® Card          | Sample | Ct <sup>1</sup> value | 1 Month |       |                   | 3 Months          |       |      | 6 Months |       |      |
|------------------------|--------|-----------------------|---------|-------|-------------------|-------------------|-------|------|----------|-------|------|
|                        |        |                       | −20 °C  | +4 °C | RT                | −20 °C            | +4 °C | RT   | −20 °C   | +4 °C | RT   |
| FTA® Classic Card      | G134   | 32.4                  | 32.8    | 33.0  | 32.3              | 30.1              | 29.4  | 31.1 | 32.4     | 30.6  | 32.0 |
|                        | G145   | 29.0                  | 25.5    | 26.0  | 27.3              | 26.8              | 24.3  | 24.8 | 27.4     | 28.5  | 26.8 |
|                        | G249   | 34.3                  | 34.1    | 33.3  | 35.8              | Neg. <sup>2</sup> | 34.0  | 32.7 | 33.6     | 33.7  | 34.7 |
|                        | G351   | 30.6                  | 31.6    | 30.2  | 31.4              | 29.7              | 29.5  | 29.1 | 29.5     | 31.3  | 30.1 |
|                        | G353   | 31.3                  | 30.9    | 30.0  | 31.3              | 30.1              | 28.8  | 28.6 | 31.4     | 30.8  | 31.2 |
| FTA® Elute Micro Card  | G134   | 32.4                  | 33.7    | 29.8  | 30.7              | 30.1              | 32.9  | 30.3 | 31.3     | 30.7  | 30.8 |
|                        | G145   | 29.0                  | 30.3    | 28.2  | Neg. <sup>2</sup> | 27.6              | 28.8  | 26.4 | 27.3     | 27.4  | 26.6 |
|                        | G249   | 34.3                  | 35.5    | 33.4  | 33.7              | 32.0              | 34.4  | 32.6 | 33.3     | 33.6  | 35.2 |
|                        | G351   | 30.6                  | 30.5    | 31.3  | 31.8              | 28.8              | 34.7  | 30.3 | 31.5     | 31.4  | 30.9 |
|                        | G353   | 31.3                  | 30.4    | 30.5  | 31.8              | 28.9              | 29.7  | 29.9 | 30.9     | 32.4  | 31.4 |
| 903 Protein Saver Card | G134   | 32.4                  | 33.4    | 33.4  | 32.1              | 30.0              | 34.6  | 32.7 | 32.2     | 31.5  | 31.5 |
|                        | G145   | 29.0                  | 28.1    | 26.4  | 26.7              | 27.9              | 30.4  | 28.7 | 27.4     | 27.4  | 27.0 |
|                        | G249   | 34.3                  | 36.9    | 34.5  | 34.3              | 31.3              | 41.7  | 33.8 | 34.6     | 35.5  | 33.8 |
|                        | G351   | 30.6                  | 32.9    | 30.6  | 31.4              | 32.0              | 34.5  | 31.5 | 31.5     | 30.9  | 30.0 |
|                        | G353   | 31.3                  | 30.8    | 30.5  | 31.8              | 31.2              | 33.4  | 32.6 | 30.1     | 31.3  | 29.8 |

<sup>1</sup> Ct: cycle threshold value obtained at the time of diagnosis.

<sup>2</sup> Sample tested twice to confirm the negative result.
